# Supplementary material for: Tanshinone IIA Inhibits Glutamate‐Induced Oxidative Toxicity through Prevention of Mitochondrial Dysfunction and Suppression of MAPK Activation in SH‐SY5Y Human Neuroblastoma Cells
Source: Hindawi journal article supplement (doi:10.1155/2017/4517486), 2017-01-01
Supplement: f2 [file 4517486.f2.pdf]

Suppl. Figure 1S

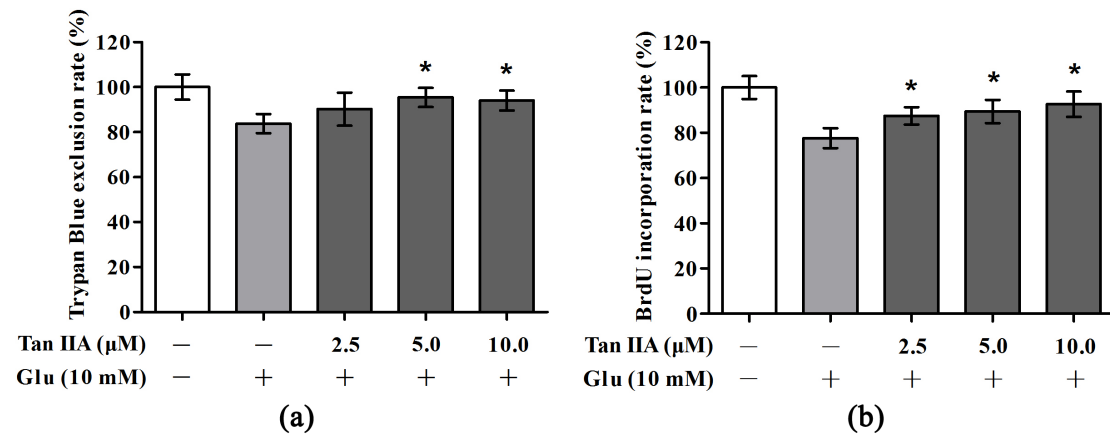

FIGURE 1S: Effect of tanshinone IIA on cell viability and proliferation in SH-SY5Y cells under glutamate intoxication. (a) Trypan Blue exclusion rate of the SH-SY5Y cells pretreated with tanshinone IIA at the indicated concentrations for 24 h and then exposed to 10 mM glutamate for another 24 h. (b) BrdU incorporation rate of the SH-SY5Y cells treated as in (a). All data are normalized to the cells without tanshinone IIA treatment and glutamate exposure and presented as mean  $\pm$  SEM of three independent experiments. Tan IIA: tanshinone IIA; Glu: glutamate. \*  $p < 0.05$  compared to the cells exposed to glutamate alone.
